# Supplementary material for: Residue Degradation and Risk Assessment of Difenoconazole and Its Metabolite during Tea Growing, Processing and Brewing by Ultra-Performance Liquid Chromatography–Tandem Mass Spectrometry Determination
Source: MDPI journal article supplement (doi:10.3390/foods13071123), 2024-04-07
Supplement: s1 [file s1]

## Supporting Information

# Residue Degradation and Risk Assessment of Difenoconazole and Its Metabolite During Tea Growing, Processing and Brewing by Ultra Performance Liquid Chromatography–Tandem Mass Spectrometry Determination

Min Wang<sup>1,2,3,†</sup>, Yating Ning<sup>1,4,†</sup>, Yue Hu<sup>1,4</sup>, Xinyi Cui<sup>2</sup>, Fengjian Luo<sup>1,5</sup>, Li Zhou<sup>1,5</sup>, Miao Yu<sup>3,\*</sup> and Xinzhong Zhang<sup>1,5,\*</sup>

<sup>1</sup> Research Center of Quality Safety for Agricultural Products, Tea Research Institute, Chinese Academy of Agricultural Sciences, Hangzhou 310008, China

<sup>2</sup> College of Horticulture and Landscape, Tianjin Agricultural University, Tianjin 300384, China

<sup>3</sup> Zhejiang Provincial Plant Protection Quarantine and Pesticide Management Institute, Hangzhou 310000, China

<sup>4</sup> Graduate School of Chinese Academy of Agricultural Sciences, Beijing 100081, China

<sup>5</sup> Key Laboratory of Tea Quality and Safety Control, Ministry of Agriculture and Rural Affairs, Hangzhou 310008, China

\*Correspondence: zhangxinzhong@tricaas.com; Tel.: +86-571-87963516; ORCID ID: 0000-0001-7369-5761; Fax: +86-571-86650331; yumiao2020@sina.com. Tel: +86-571-86757007.

<sup>†</sup> Co-first author. Min Wang and Yating Ning are equal contribution to this paper.

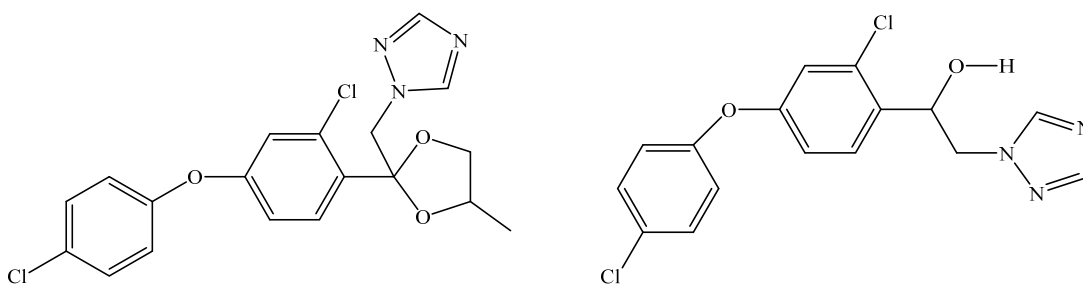

**Suppl Figure S1.** Chemical structures of difenoconazole and its metabolite difenoconazole-alcohol.



**Suppl Table S2.** The average residues, dissipation rates, dissipation equations,  $R^2$  and  $t_{1/2}$  of difenoconazole and difenoconazole-alcohol in fresh tea leaves.

| Compound             | difenoconazole                |                         | difenoconazole-alcohol        |                         |
|----------------------|-------------------------------|-------------------------|-------------------------------|-------------------------|
| Time (d)             | Residues<br>(mg/kg, $\pm$ SD) | Dissipation<br>Rate (%) | Residues<br>(mg/kg, $\pm$ SD) | Dissipation<br>Rate (%) |
| 0 (2 h)              | 16.339 $\pm$ 1.418            | /                       | 0.212 $\pm$ 0.028             | /                       |
| 1                    | 15.759 $\pm$ 0.256            | 3.5                     | 0.705 $\pm$ 0.020             | -232.4                  |
| 2                    | 8.753 $\pm$ 0.304             | 46.4                    | 0.542 $\pm$ 0.029             | -155.7                  |
| 3                    | 7.883 $\pm$ 0.266             | 51.8                    | 0.435 $\pm$ 0.017             | -105.2                  |
| 5                    | 2.886 $\pm$ 0.331             | 82.3                    | 0.079 $\pm$ 0.011             | 62.9                    |
| 7                    | 1.562 $\pm$ 0.169             | 90.4                    | 0.042 $\pm$ 0.002             | 80.1                    |
| 10                   | 0.348 $\pm$ 0.032             | 97.9                    | 0.005 $\pm$ 0.003             | 97.9                    |
| 14                   | 0.018 $\pm$ 0.003             | 99.9                    | 0.001 $\pm$ 0.001             | 99.5                    |
| Dissipation equation | $C = 17.771e^{-0.392t}$       |                         | -                             |                         |
| $R^2$                | 0.9641                        |                         | -                             |                         |
| $t_{1/2}$ (d)        | 1.77                          |                         | -                             |                         |

**Suppl Table S3.** The residues and processing factors of difenoconazole and difenoconazole-alcohol in green tea processing

| Processing steps         | Time<br>(d) | Moisture<br>content<br>(%) | difenoconazole            | difenoconazole<br>(expect for moisture) | difenoconazole-alcohol   | difenoconazole-alcohol<br>(expect for moisture) |
|--------------------------|-------------|----------------------------|---------------------------|-----------------------------------------|--------------------------|-------------------------------------------------|
|                          |             |                            | Residues                  | Residues                                | Residues                 | Residues                                        |
|                          |             |                            | (mg/kg, $\pm$ SD) (PF)    | (mg/kg, $\pm$ SD) (PF)                  | (mg/kg, $\pm$ SD) (PF)   | (mg/kg, $\pm$ SD) (PF)                          |
| Fresh tea leaves         | 1           | 77.9                       | 4.796 $\pm$ 0.025 (-)     | 21.704 $\pm$ 0.113 (-)                  | 0.194 $\pm$ 0.002 (-)    | 0.878 $\pm$ 0.009 (-)                           |
|                          | 5           | 80.6                       | 1.026 $\pm$ 0.027 (-)     | 5.286 $\pm$ 0.138 (-)                   | 0.038 $\pm$ 0.000 (-)    | 0.199 $\pm$ 0.002 (-)                           |
|                          | 7           | 76.6                       | 0.408 $\pm$ 0.002 (-)     | 1.743 $\pm$ 0.003 (-)                   | 0.015 $\pm$ 0.000 (-)    | 0.062 $\pm$ 0.001 (-)                           |
|                          | 10          | 78.8                       | 0.108 $\pm$ 0.000 (-)     | 0.508 $\pm$ 0.006 (-)                   | 0.004 $\pm$ 0.000 (-)    | 0.020 $\pm$ 0.000 (-)                           |
| Fixing                   | 1           | 64.2                       | 7.186 $\pm$ 0.189 (1.50)  | 20.072 $\pm$ 0.528 (0.92)               | 0.327 $\pm$ 0.011 (1.69) | 0.913 $\pm$ 0.030 (1.04)                        |
|                          | 5           | 66.6                       | 1.571 $\pm$ 0.074 (1.53)  | 4.703 $\pm$ 0.220 (0.89)                | 0.047 $\pm$ 0.002 (1.24) | 0.140 $\pm$ 0.006 (0.70)                        |
|                          | 7           | 63.2                       | 0.712 $\pm$ 0.023 (1.75)  | 1.934 $\pm$ 0.064 (1.11)                | 0.021 $\pm$ 0.001 (1.40) | 0.058 $\pm$ 0.002 (0.94)                        |
|                          | 10          | 66.1                       | 0.180 $\pm$ 0.003 (1.67)  | 0.530 $\pm$ 0.009 (1.04)                | 0.007 $\pm$ 0.000 (1.75) | 0.020 $\pm$ 0.000 (1.00)                        |
| Rolling                  | 1           | 65                         | 6.441 $\pm$ 0.278 (0.90)  | 18.409 $\pm$ 0.783 (0.92)               | 0.287 $\pm$ 0.024 (0.88) | 0.821 $\pm$ 0.069 (0.90)                        |
|                          | 5           | 64.8                       | 1.613 $\pm$ 0.103 (1.03)  | 4.584 $\pm$ 0.294 (0.97)                | 0.052 $\pm$ 0.003 (1.11) | 0.147 $\pm$ 0.010 (1.05)                        |
|                          | 7           | 62.7                       | 0.656 $\pm$ 0.012 (0.92)  | 1.757 $\pm$ 0.031 (0.91)                | 0.021 $\pm$ 0.000 (1.00) | 0.055 $\pm$ 0.001 (0.95)                        |
|                          | 10          | 63.7                       | 0.181 $\pm$ 0.002 (1.01)  | 0.498 $\pm$ 0.005 (0.94)                | 0.007 $\pm$ 0.000 (1.00) | 0.018 $\pm$ 0.001 (0.90)                        |
| Drying                   | 1           | 5                          | 17.776 $\pm$ 1.336 (2.76) | 18.711 $\pm$ 1.406 (1.02)               | 0.655 $\pm$ 0.047 (2.28) | 0.689 $\pm$ 0.049 (0.84)                        |
|                          | 5           | 5.75                       | 4.542 $\pm$ 0.151 (2.82)  | 4.819 $\pm$ 0.160 (1.05)                | 0.138 $\pm$ 0.005 (2.65) | 0.147 $\pm$ 0.005 (1.00)                        |
|                          | 7           | 5.5                        | 1.731 $\pm$ 0.140 (2.64)  | 1.832 $\pm$ 0.149 (1.04)                | 0.051 $\pm$ 0.007 (2.43) | 0.054 $\pm$ 0.008 (0.98)                        |
|                          | 10          | 6.25                       | 0.483 $\pm$ 0.000 (2.67)  | 0.515 $\pm$ 0.011 (1.03)                | 0.016 $\pm$ 0.000 (2.29) | 0.017 $\pm$ 0.000 (0.94)                        |
| Total PF <sup>b</sup>    | 1           | -                          | 3.71 (-271)               | 0.86 (14)                               | 3.38 (-238)              | 0.78 (22)                                       |
| (Degradation<br>rate, %) | 5           | -                          | 4.43 (-343)               | 0.91 (9)                                | 3.63 (-263)              | 0.74 (26)                                       |
|                          | 7           | -                          | 4.24 (-324)               | 1.05 (-5)                               | 3.40 (-240)              | 0.87 (13)                                       |
|                          | 10          | -                          | 4.47 (-347)               | 1.01 (-1)                               | 4.00 (-300)              | 0.85 (15)                                       |
|                          | Average     | -                          | 4.21 (-321)               | 0.90 (4)                                | 3.60 (-260)              | 0.81 (19)                                       |

**Suppl Table S4.** The residues and processing factors of difenoconazole and difenoconazole-alcohol in black tea processing

| Processing steps      | Time<br>(d) | Moisture content<br>(%) | difenoconazole            | difenoconazole<br>(expect for moisture) | difenoconazole-alcohol   | difenoconazole-alcohol<br>(expect for moisture) |
|-----------------------|-------------|-------------------------|---------------------------|-----------------------------------------|--------------------------|-------------------------------------------------|
|                       |             |                         | Residues                  | Residues                                | Residues                 | Residues                                        |
|                       |             |                         | (mg/kg, $\pm$ SD) (PF)    | (mg/kg, $\pm$ SD) (PF)                  | (mg/kg, $\pm$ SD) (PF)   | (mg/kg, $\pm$ SD) (PF)                          |
| Fresh tea leaves      | 1           | 77.9                    | 4.796 $\pm$ 0.025 (-)     | 21.704 $\pm$ 0.113 (-)                  | 0.194 $\pm$ 0.002 (-)    | 0.878 $\pm$ 0.009 (-)                           |
|                       | 5           | 80.6                    | 1.026 $\pm$ 0.027 (-)     | 5.286 $\pm$ 0.138 (-)                   | 0.038 $\pm$ 0.000 (-)    | 0.199 $\pm$ 0.002 (-)                           |
|                       | 7           | 76.6                    | 0.408 $\pm$ 0.002 (-)     | 1.743 $\pm$ 0.003 (-)                   | 0.015 $\pm$ 0.000 (-)    | 0.062 $\pm$ 0.001 (-)                           |
|                       | 10          | 78.8                    | 0.108 $\pm$ 0.000 (-)     | 0.508 $\pm$ 0.006 (-)                   | 0.004 $\pm$ 0.000 (-)    | 0.020 $\pm$ 0.000 (-)                           |
| Withering             | 1           | 73.0                    | 6.089 $\pm$ 0.324 (1.27)  | 23.240 $\pm$ 1.238 (1.07)               | 0.383 $\pm$ 0.018 (1.97) | 1.461 $\pm$ 0.070 (1.66)                        |
|                       | 5           | 73.3                    | 1.248 $\pm$ 0.016 (1.22)  | 5.403 $\pm$ 0.071 (1.02)                | 0.040 $\pm$ 0.001 (1.05) | 0.175 $\pm$ 0.004 (0.88)                        |
|                       | 7           | 73.0                    | 0.521 $\pm$ 0.057 (1.28)  | 1.929 $\pm$ 0.210 (1.11)                | 0.015 $\pm$ 0.002 (1.00) | 0.057 $\pm$ 0.006 (0.92)                        |
|                       | 10          | 76.9                    | 0.109 $\pm$ 0.007 (1.01)  | 0.409 $\pm$ 0.027 (0.81)                | 0.005 $\pm$ 0.000 (1.25) | 0.017 $\pm$ 0.001 (0.85)                        |
| Rolling               | 1           | 71.7                    | 6.707 $\pm$ 0.115 (1.10)  | 23.050 $\pm$ 0.394 (0.99)               | 0.447 $\pm$ 0.005 (1.17) | 1.537 $\pm$ 0.016 (1.05)                        |
|                       | 5           | 71.4                    | 1.303 $\pm$ 0.095 (1.04)  | 5.429 $\pm$ 0.396 (1.00)                | 0.052 $\pm$ 0.002 (1.30) | 0.218 $\pm$ 0.008 (1.25)                        |
|                       | 7           | 71.1                    | 0.613 $\pm$ 0.026 (1.18)  | 2.121 $\pm$ 0.088 (1.10)                | 0.019 $\pm$ 0.001 (1.27) | 0.062 $\pm$ 0.005 (1.09)                        |
|                       | 10          | 76.0                    | 0.127 $\pm$ 0.009 (1.17)  | 0.446 $\pm$ 0.033 (1.09)                | 0.005 $\pm$ 0.000 (1.00) | 0.019 $\pm$ 0.001 (1.12)                        |
| Fermentation          | 1           | 71.6                    | 6.128 $\pm$ 0.319 (0.91)  | 21.655 $\pm$ 1.126 (0.94)               | 0.525 $\pm$ 0.042 (1.17) | 1.857 $\pm$ 0.148 (1.21)                        |
|                       | 5           | 71.2                    | 1.333 $\pm$ 0.021 (1.02)  | 5.603 $\pm$ 0.088 (1.03)                | 0.059 $\pm$ 0.000 (1.13) | 0.250 $\pm$ 0.002 (1.15)                        |
|                       | 7           | 70.2                    | 0.604 $\pm$ 0.017 (0.99)  | 2.025 $\pm$ 0.057 (0.95)                | 0.022 $\pm$ 0.000 (1.16) | 0.073 $\pm$ 0.001 (1.18)                        |
|                       | 10          | 76.2                    | 0.123 $\pm$ 0.016 (0.96)  | 0.426 $\pm$ 0.057 (0.96)                | 0.007 $\pm$ 0.000 (1.40) | 0.025 $\pm$ 0.001 (1.32)                        |
| Drying                | 1           | 1.5                     | 20.711 $\pm$ 0.409 (3.38) | 20.983 $\pm$ 0.414 (0.97)               | 1.436 $\pm$ 0.041 (2.74) | 1.455 $\pm$ 0.042 (0.78)                        |
|                       | 5           | 1.4                     | 4.862 $\pm$ 0.412 (3.65)  | 4.941 $\pm$ 0.419 (0.88)                | 0.210 $\pm$ 0.012 (3.56) | 0.213 $\pm$ 0.012 (0.85)                        |
|                       | 7           | 1.3                     | 1.944 $\pm$ 0.104 (3.22)  | 1.969 $\pm$ 0.105 (0.97)                | 0.050 $\pm$ 0.004 (2.27) | 0.051 $\pm$ 0.004 (0.70)                        |
|                       | 10          | 1.6                     | 0.417 $\pm$ 0.012 (3.39)  | 0.423 $\pm$ 0.012 (0.99)                | 0.022 $\pm$ 0.001 (3.14) | 0.021 $\pm$ 0.001 (0.84)                        |
| Total PF <sup>a</sup> | 1           | -                       | 4.32 (-332)               | 0.97 (3)                                | 7.36 (-640)              | 1.66(-66)                                       |
| (Degradation rate, %) | 5           | -                       | 4.74 (-374)               | 0.93 (7)                                | 5.53 (-453)              | 1.07 (-7)                                       |
|                       | 7           | -                       | 4.76 (-376)               | 1.13 (-13)                              | 3.93 (-233)              | 0.82 (18)                                       |
|                       | 10          | -                       | 3.86 (-286)               | 0.83 (17)                               | 5.25 (-450)              | 1.05 (-5)                                       |
| Average               |             | -                       | 4.42 (-342)               | 0.98 (3)                                | 5.44 (-444)              | 1.16 (-15)                                      |

**Suppl Table S5.** Residues and leaching rates of difenoconazole and difenoconazole-alcohol during black tea brewing.

| Compound                   | Time<br>(d) | First infusion (T1) |                 | Second infusion (T2) |                 | Third infusion (T3) |                 | LRt<br>(%) | Spent leaves (SL) |      |
|----------------------------|-------------|---------------------|-----------------|----------------------|-----------------|---------------------|-----------------|------------|-------------------|------|
|                            |             | Residues            | LR <sub>1</sub> | Residues             | LR <sub>2</sub> | Residues            | LR <sub>3</sub> |            | Residues          | RR   |
|                            |             | (mg/kg, ±SD)        | (%)             | (mg/kg, ±SD)         | (%)             | (mg/kg, ±SD)        | (%)             |            | (mg/kg, ±SD)      | (%)  |
| difenoconazole             | 1           | 1.402±0.086         | 7.6             | 1.104±0.096          | 5.9             | 0.823±0.064         | 4.4             | 17.9       | 15.238±0.877      | 82.1 |
|                            | 5           | 0.210±0.016         | 4.9             | 0.135±0.008          | 3.1             | 0.138±0.020         | 3.2             | 11.3       | 3.815±0.198       | 88.7 |
|                            | 7           | 0.073±0.004         | 4.0             | 0.059±0.004          | 3.3             | 0.058±0.005         | 3.2             | 10.5       | 1.627±0.046       | 89.5 |
|                            | 10          | 0.022±0.001         | 3.8             | 0.014±0.001          | 2.5             | 0.012±0.001         | 2.1             | 8.4        | 0.527±0.018       | 91.6 |
| difenoconazole-<br>alcohol | 1           | 0.210±0.031         | 13.2            | 0.153±0.010          | 9.6             | 0.137±0.025         | 9.0             | 31.8       | 1.085±0.096       | 68.2 |
|                            | 5           | 0.040±0.003         | 16.2            | 0.023±0.002          | 9.5             | 0.020±0.003         | 8.1             | 33.8       | 0.163±0.018       | 66.2 |
|                            | 7           | 0.015±0.001         | 16.9            | 0.009±0.000          | 10.1            | 0.010±0.001         | 11.8            | 38.9       | 0.053±0.001       | 61.1 |
|                            | 10          | 0.006±0.000         | 16.4            | 0.004±0.001          | 12.1            | 0.003±0.000         | 8.7             | 37.2       | 0.022±0.002       | 62.8 |

**Suppl Table S6.** Residues and leaching rates of difenoconazole and difenoconazole-alcohol during green tea brewing.

| Compound                   | Time<br>(d) | First infusion (T1) |                 | Second infusion (T2) |                 | Third infusion (T3) |                 | LRt<br>(%) | Spent leaves (SL) |      |
|----------------------------|-------------|---------------------|-----------------|----------------------|-----------------|---------------------|-----------------|------------|-------------------|------|
|                            |             | Residues            | LR <sub>1</sub> | Residues             | LR <sub>2</sub> | Residues            | LR <sub>3</sub> |            | Residues          | RR   |
|                            |             | (mg/kg, ±SD)        | (%)             | (mg/kg, ±SD)         | (%)             | (mg/kg, ±SD)        | (%)             |            | (mg/kg, ±SD)      | (%)  |
| difenoconazole             | 1           | 2.165±0.104         | 8.6             | 2.305±0.138          | 9.1             | 1.459±0.019         | 5.8             | 23.5       | 19.345±1.213      | 76.5 |
|                            | 5           | 0.329±0.028         | 6.5             | 0.249±0.030          | 4.5             | 0.226±0.008         | 4.5             | 15.4       | 4.272±0.267       | 84.6 |
|                            | 7           | 0.126±0.018         | 7.4             | 0.058±0.009          | 5.0             | 0.085±0.001         | 4.9             | 17.3       | 1.422±0.028       | 82.7 |
|                            | 10          | 0.035±0.003         | 7.2             | 0.028±0.004          | 5.9             | 0.025±0.005         | 5.2             | 18.4       | 0.394±0.017       | 81.6 |
| difenoconazole-<br>alcohol | 1           | 0.141±0.008         | 15.1            | 0.145±0.010          | 15.5            | 0.082±0.005         | 8.8             | 39.4       | 0.567±0.012       | 60.6 |
|                            | 5           | 0.030±0.001         | 20.2            | 0.025±0.001          | 16.9            | 0.015±0.001         | 10.5            | 47.6       | 0.077±0.002       | 52.4 |
|                            | 7           | 0.015±0.002         | 25.1            | 0.006±0.000          | 14.5            | 0.006±0.000         | 10.9            | 50.6       | 0.030±0.002       | 49.4 |
|                            | 10          | 0.005±0.001         | 17.3            | 0.003±0.001          | 8.5             | 0.002±0.000         | 4.7             | 30.4       | 0.022±0.000       | 69.6 |
